# Supplementary material for: A voltage-dependent K+ channel in the lysosome is required for refilling lysosomal Ca2+ stores
Source: PubMed Central journal article supplement — J Cell Biol. 2017 Jun 5;216(6):1715–30. doi: 10.1083/jcb.201612123 (PMC5461029; doi:10.1083/jcb.201612123), 2017-06-05
Supplement: JCB_201612123_sm.pdf [file JCB_201612123_sm.pdf]

Wang et al., <https://doi.org/10.1083/jcb.201612123>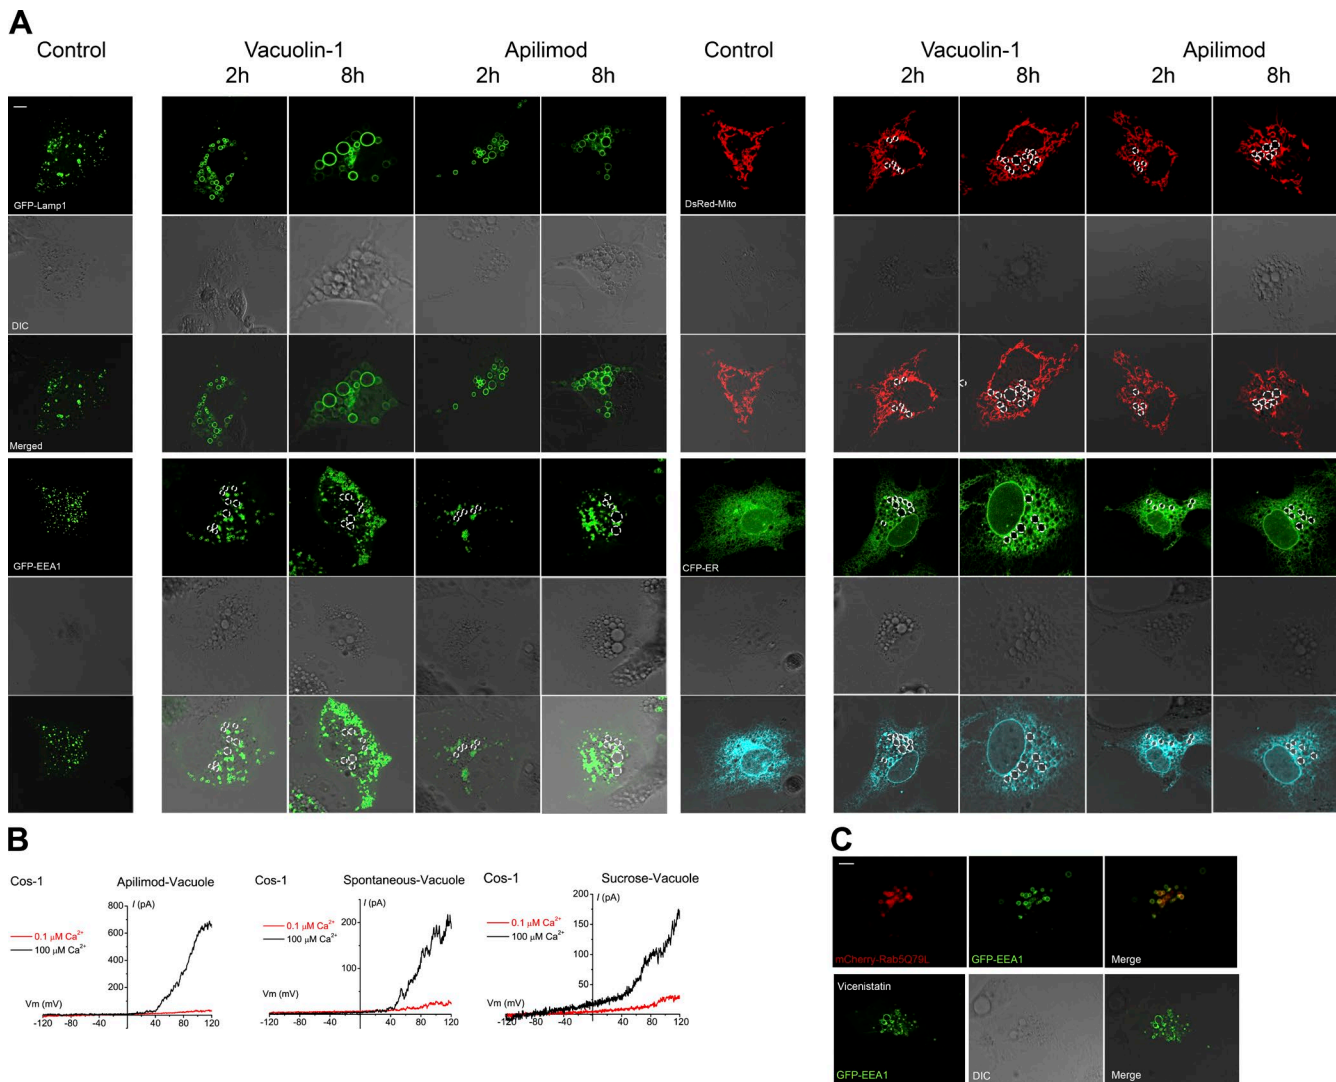

Figure S1. **Vacuolin-1 selectively enlarges endosomes and lysosomes.** (A) Vacuolin-1 and Apilimod (2- and 8-h treatment) enlarged Lamp-1-positive compartments. The enlarged vacuoles were negative for mitochondrial (DsRed-Mito) or ER (CFP-ER) markers. EEA1-positive compartments were slightly enlarged up to 1  $\mu$ m. Bar, 5  $\mu$ m. (B)  $Ca^{2+}$ -activated outward currents in vacuoles that were enlarged spontaneously, by apilimod (1  $\mu$ M for 8 h), and by sucrose treatment (50 mM for 8 h), respectively. (C) Overexpressing Rab5-Q79L or application of vicenistatin in Cos-1 cells enlarged EEA1-positive vacuoles. Bar, 10  $\mu$ m.

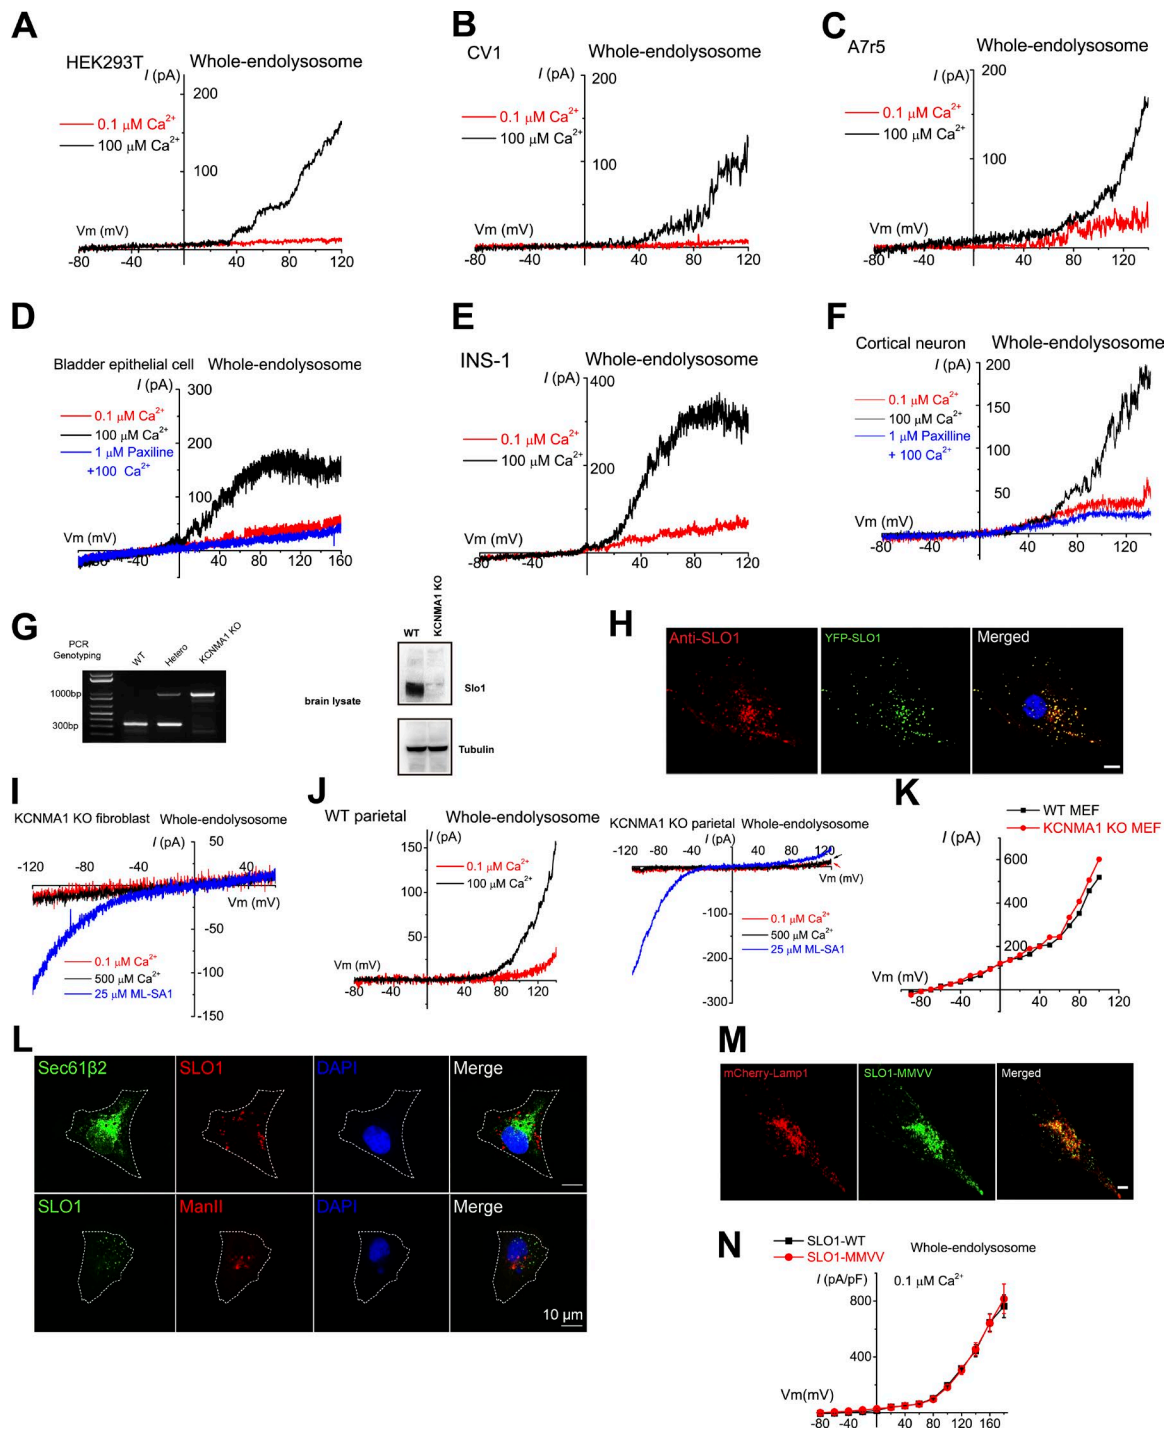

Figure S2. **LysoK<sub>VCa</sub> currents are present in a variety of cell types.** (A–F) Representative whole-endolysosome LysoK<sub>VCa</sub> currents in enlarged vacuoles from HEK293T cells (A), monkey kidney CV1 cell lines (B), A7r5 smooth muscle cell lines (C), BECs (D), pancreatic INS-1 cell lines (E), and cultured mouse cortical neurons (F). (G) left, PCR genotyping of WT (*Kcnma1*<sup>+/+</sup>), heterozygous (*Kcnma1*<sup>+/-</sup>), and KCNMA1 KO (*Kcnma1*<sup>-/-</sup>) mice. right, Western blot analysis of endogenous SLO1 proteins using anti-SLO1 antibodies with KCNMA1 KO as controls. (H) Immunofluorescence analysis of overexpressed SLO1 proteins using anti-SLO1 antibodies. Bar, 5  $\mu\text{m}$ . (I) KCNMA1 KO MEFs had whole-endolysosome ML-SA1-activated currents, but no evidence of LysoK<sub>VCa</sub>. (J) Whole-endolysosome Ca<sup>2+</sup>-activated outward currents in WT and KCNMA1 KO parietal cells. (K) Endogenous whole-cell K<sup>+</sup> currents in both WT and KCNMA1 KO MEF cells. Note that low [Cl<sup>-</sup>] (11 mM) was used in the bath solution. (L) Colocalization analyses of SLO1-mCherry with Sec61 $\beta$ 2 (an ER marker) and SLO1-GFP with ManII (a Golgi marker). Bar, 10  $\mu\text{m}$ . (M) Confocal images showing the expression of SLO1-MMVV-YFP [L<sup>488</sup>I<sup>489</sup> to MM and L<sup>734</sup>I<sup>735</sup> to VV] in Cos1 cells. Bar, 10  $\mu\text{m}$ . (N) Lyso-SLO1 currents in cells transfected with WT SLO1-YFP and SLO1-MMVV-YFP.

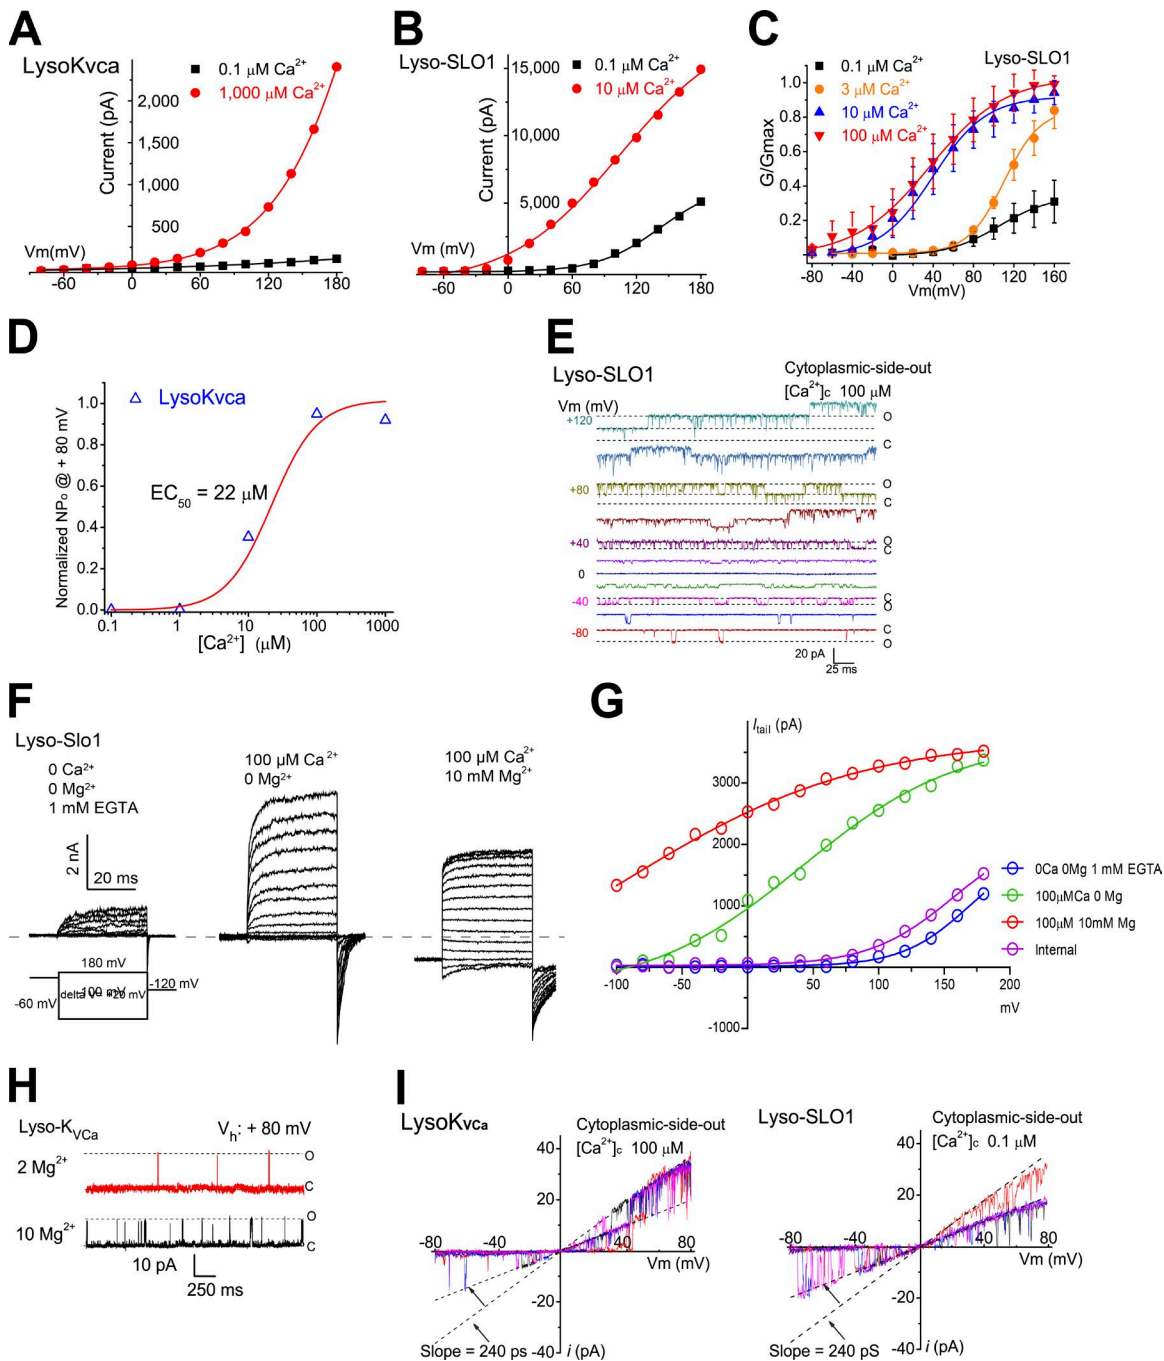

Figure S3. **Regulation of LysoK<sub>Vca</sub> by Ca<sup>2+</sup>, Mg<sup>2+</sup>, and membrane voltages.** (A) Current–voltage relationship (I–V) plot of LysoK<sub>Vca</sub> based on the step currents shown in Fig. 3 A. (B) I–V of Lyso-SLO1 was plotted based on the step currents shown in Fig. 3 B. (C) Normalized conductance–voltage relationship (G–V) for Lyso-SLO1 at 0.1, 3, 10, and 100 μM [Ca<sup>2+</sup>]<sub>c</sub>. The half-maximal activation voltage ( $V_{0.5}$ ; Boltzmann fitting) was shifted from 100 mV at 3 μM Ca<sup>2+</sup> to 40 mV at 10 μM Ca<sup>2+</sup>. Error bars indicate SEM. (D) [Ca<sup>2+</sup>]<sub>c</sub> increased NP<sub>o</sub> of single LysoK<sub>Vca</sub> currents with an EC<sub>50</sub> of 22 μM at 80 mV. (E) Single-channel openings of Lyso-SLO1 across a range of voltages (–80, –40, 0, 40, 80, and 120 mV) from a cytoplasmic-side-out patch at a [Ca<sup>2+</sup>]<sub>c</sub> of 100 μM under symmetric K<sup>+</sup> (cytoplasmic/luminal: 140 mM) solution conditions. (F) Effects of 10 mM [Mg<sup>2+</sup>]<sub>c</sub> and 100 μM [Ca<sup>2+</sup>]<sub>c</sub> on Lyso-SLO1 under symmetric K<sup>+</sup> (140 mM) using a voltage step protocol shown in the bottom left. (G) Tail current analysis of [Mg<sup>2+</sup>]<sub>c</sub> and [Ca<sup>2+</sup>]<sub>c</sub> sensitivities of voltage-dependent activation of Lyso-SLO1 based on the step currents shown in F. (H) Effects of [Mg<sup>2+</sup>]<sub>c</sub> on single LysoK<sub>Vca</sub> currents at 80 mV. (I) Single-channel currents of LysoK<sub>Vca</sub> and Lyso-SLO1 generated by voltage ramps from –80 to 80 mV. The slope conductance (dashed lines) was 240 pS for both LysoK<sub>Vca</sub> (100 μM Ca<sup>2+</sup>) and Lyso-SLO1 (0.1 μM Ca<sup>2+</sup>).

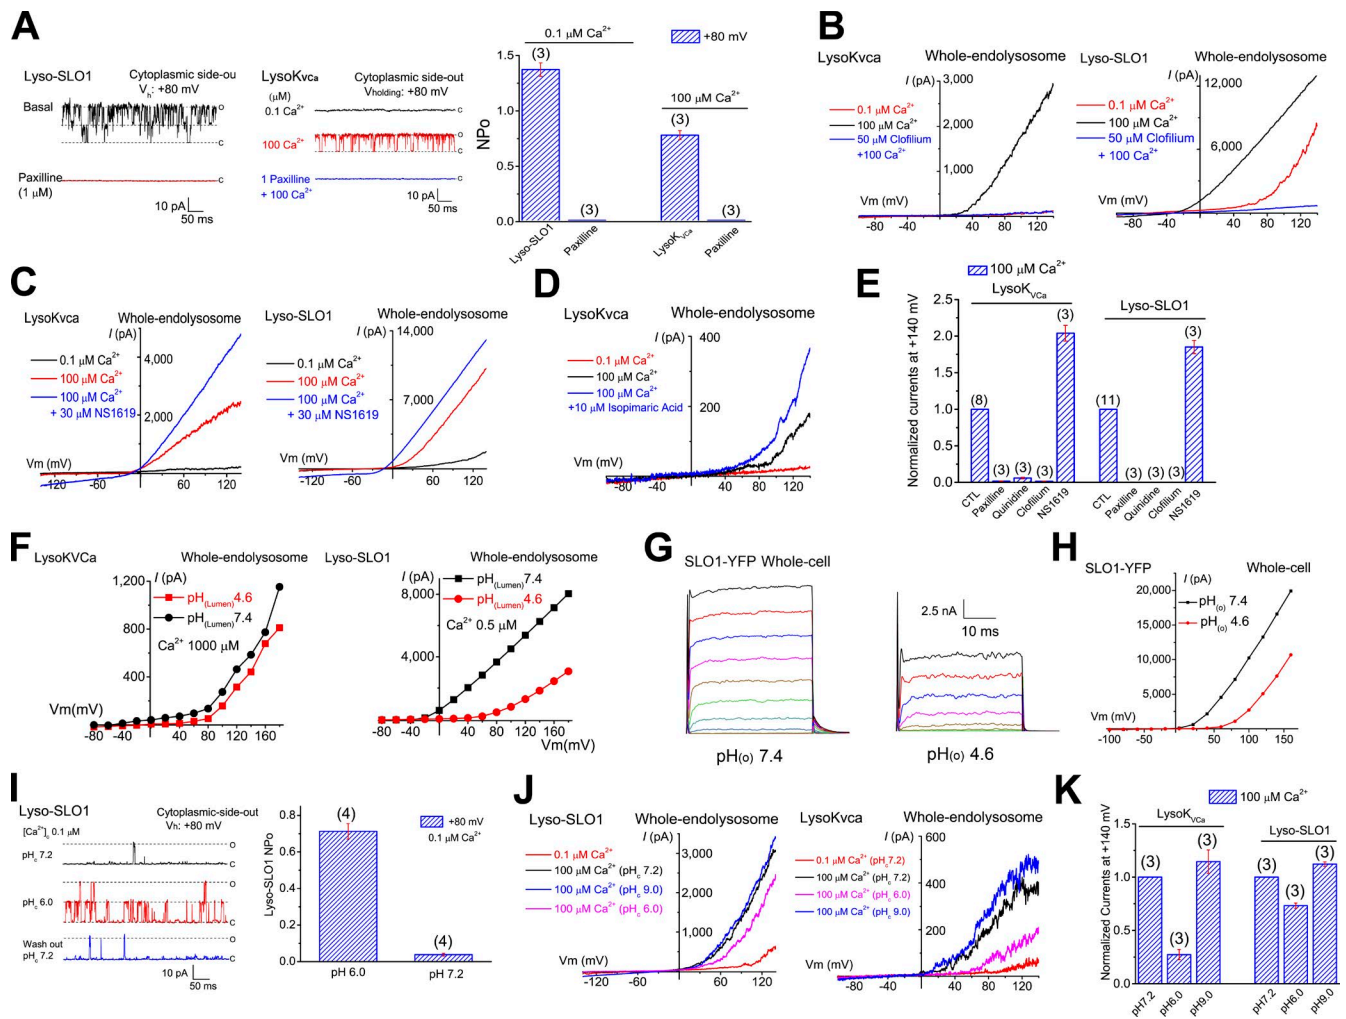

**Figure S4. Regulation of LysoK<sub>Vca</sub> by BK modulators and pH.** (A) Paxilline (1  $\mu\text{M}$ ) inhibited single LysoK<sub>Vca</sub> and Lyso-SLO1 currents completely. (B) Clofilium (50  $\mu\text{M}$ ), an inhibitor specific to SLO-family K<sup>+</sup> channels, inhibited LysoK<sub>Vca</sub> (top) and Lyso-SLO1 (bottom) completely. (C) The BK channel opener NS1619 further augmented LysoK<sub>Vca</sub> and Lyso-SLO1 currents activated by 100  $\mu\text{M Ca}^{2+}$ . (D) Isopimaric acid, another BK channel opener, also potentiated LysoK<sub>Vca</sub> in the presence of 100  $\mu\text{M Ca}^{2+}$ . (E) Normalized LysoK<sub>Vca</sub> and Lyso-SLO1 currents at the voltage of 140 mV under different experimental conditions. (F) Representative traces of Lyso-SLO1 activation by  $0.5 \mu\text{M Ca}^{2+}$  under  $\text{pH}_{\text{lumen}}$  7.4 or 4.6. (G and H) Representative step currents showing the effect of acidic extracellular pH ( $\text{pH}_{\text{e}}$  4.6) on whole-cell K<sup>+</sup> currents in SLO1-YFP-expressing HEK293T cells. Currents were elicited by voltage steps from -100 to 160 mV in 20-mV increments with a 100- $\mu\text{M Ca}^{2+}$  pipette solution. Current-voltage relationship of whole-cell SLO1 currents plotted from the step currents shown. (I) Acidic cytoplasmic pH ( $\text{pH}_{\text{c}}$  6.0) activated LysoK<sub>Vca</sub> directly in basal ( $0.1 \mu\text{M}$ , calculated based on maxchelator)  $[\text{Ca}^{2+}]_{\text{c}}$ . (J) Alkaline  $\text{pH}_{\text{c}}$  9.0 potentiated and acidic  $\text{pH}_{\text{c}}$  6.0 inhibited LysoK<sub>Vca</sub> and Lyso-SLO1 in the presence of 100  $\mu\text{M Ca}^{2+}$ . (K) Normalized LysoK<sub>Vca</sub> and Lyso-SLO1 currents at the voltage of 140 mV under different experimental conditions. Means  $\pm$  SEM are shown in A, E, I, and K.

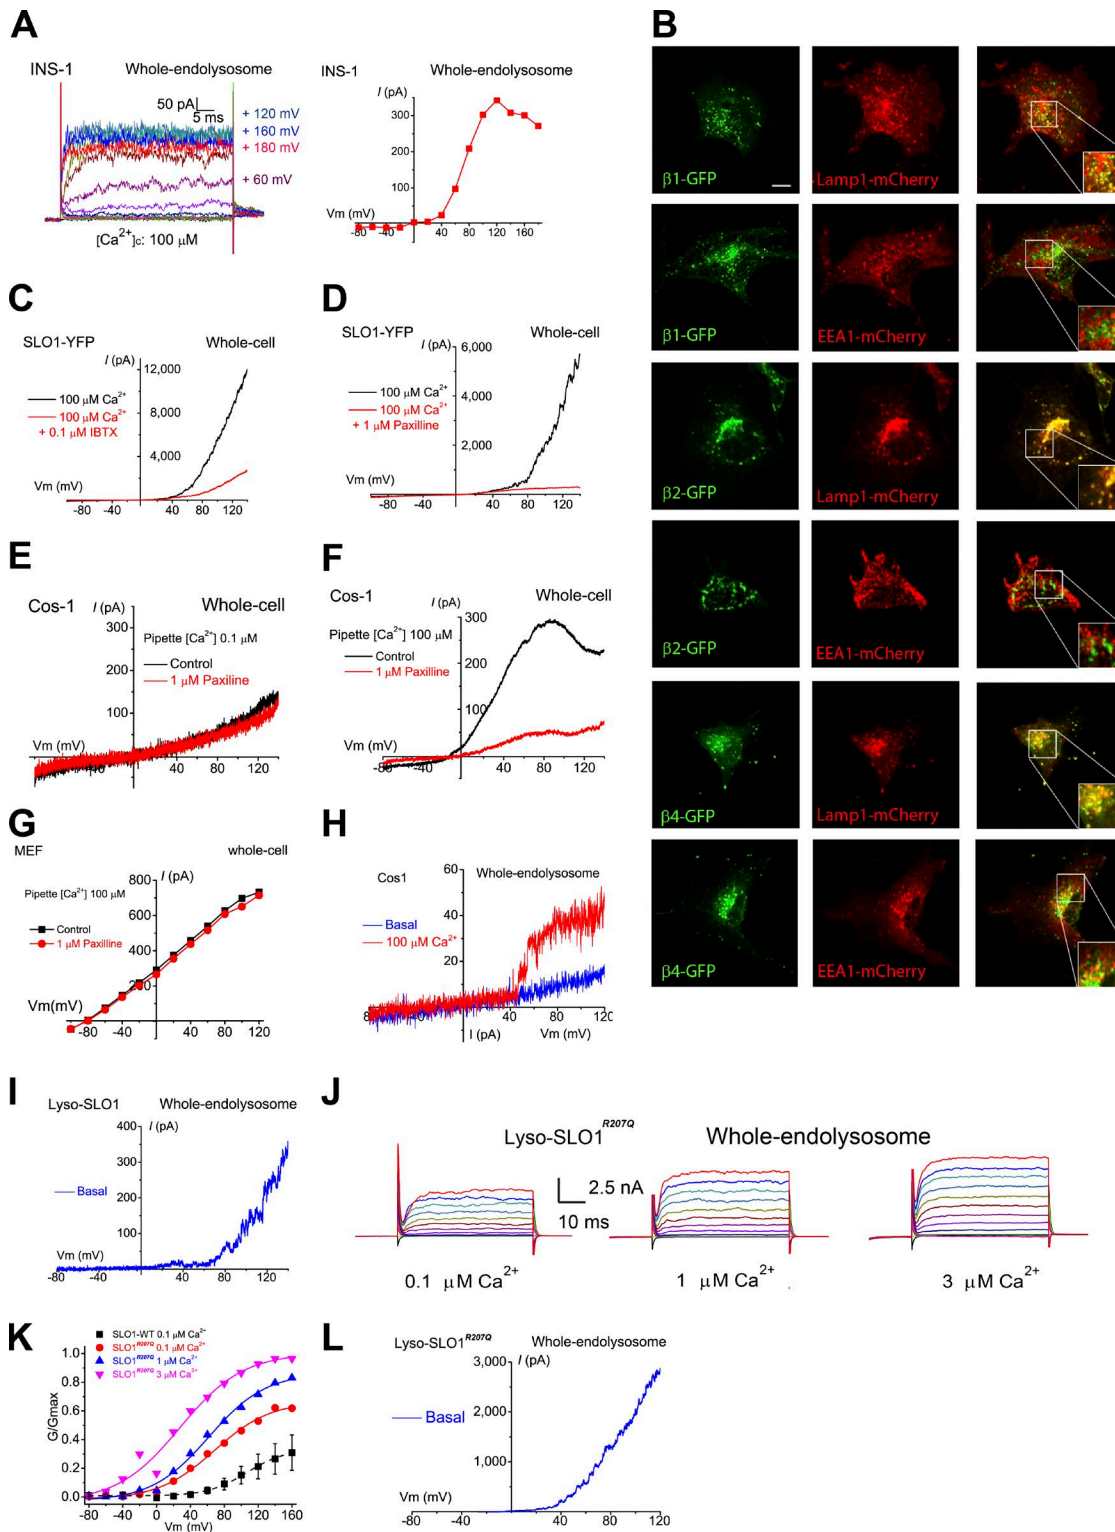

Figure S5. **Cell type-specific properties of LysoK<sub>VCa</sub> may be conferred by lysosomal localization of auxiliary  $\beta$  subunits.** (A) Representative whole-endolysosome LysoK<sub>VCa</sub> step currents in INS-1 pancreatic cell lines. The currents were elicited by step voltages from  $-80$  to  $180$  mV in the presence of  $100 \mu\text{M}$   $[\text{Ca}^{2+}]_c$ . (B) Colocalization analyses of GFP-tagged KCNB1 ( $\beta 1$ ), B2 ( $\beta 2$ ), and B4 ( $\beta 4$ ) proteins with Lamp1 or EEA1 in Cos-1 cells. Note that the colocalization of  $\beta 2$ -GFP with Lamp1 was duplicated from Fig. 4 B for comparison. Bar,  $10 \mu\text{M}$  for all images in B. (C and D) Whole-cell K<sup>+</sup> currents were inhibited by bath application of BK inhibitors IBTX ( $100 \text{ nM}$ ; C) and paxilline ( $1 \mu\text{M}$ ; D) in SLO1-expressing HEK293T cells. The pipette solution contained  $100 \mu\text{M}$   $\text{Ca}^{2+}$ . (E) Whole-cell K<sup>+</sup> currents in nontransfected Cos-1 cells. The pipette solution contained  $0.1 \mu\text{M}$   $\text{Ca}^{2+}$ . (F) Whole-cell K<sup>+</sup> currents were seen in nontransfected Cos-1 cells with the pipette solution containing  $100 \mu\text{M}$   $\text{Ca}^{2+}$ . Currents were sensitive to paxilline ( $1 \mu\text{M}$ ). (G) Whole-cell K<sup>+</sup> currents with or without paxilline ( $1 \mu\text{M}$ ) application in MEFs. The pipette solution contained  $100 \mu\text{M}$   $\text{Ca}^{2+}$ . (H) Activation of LysoK<sub>VCa</sub> by  $100 \mu\text{M}$   $[\text{Ca}^{2+}]_c$  with the same vacuole that was current-clamped in Fig. 5 G. (I)  $[\text{Ca}^{2+}]_c$  was  $0.1 \mu\text{M}$ . Data are from the same vacuole that was current-clamped in Fig. 5 H. (J) Step currents of Lyso-SLO1<sup>R207Q</sup> at  $[\text{Ca}^{2+}]_c$  of  $0.1 \mu\text{M}$ ,  $1 \mu\text{M}$ , and  $3 \mu\text{M}$ . (K) Normalized G–V curves of Lyso-SLO1<sup>R207Q</sup>. Lyso-SLO1 was replotted (dotted line) from Fig. S3 C for comparison. (L) Basal currents of Lyso-SLO1<sup>R207Q</sup> with  $0.1 \mu\text{M}$   $[\text{Ca}^{2+}]_c$ . Data are from the same vacuole that was current-clamped in Fig. 5 I.

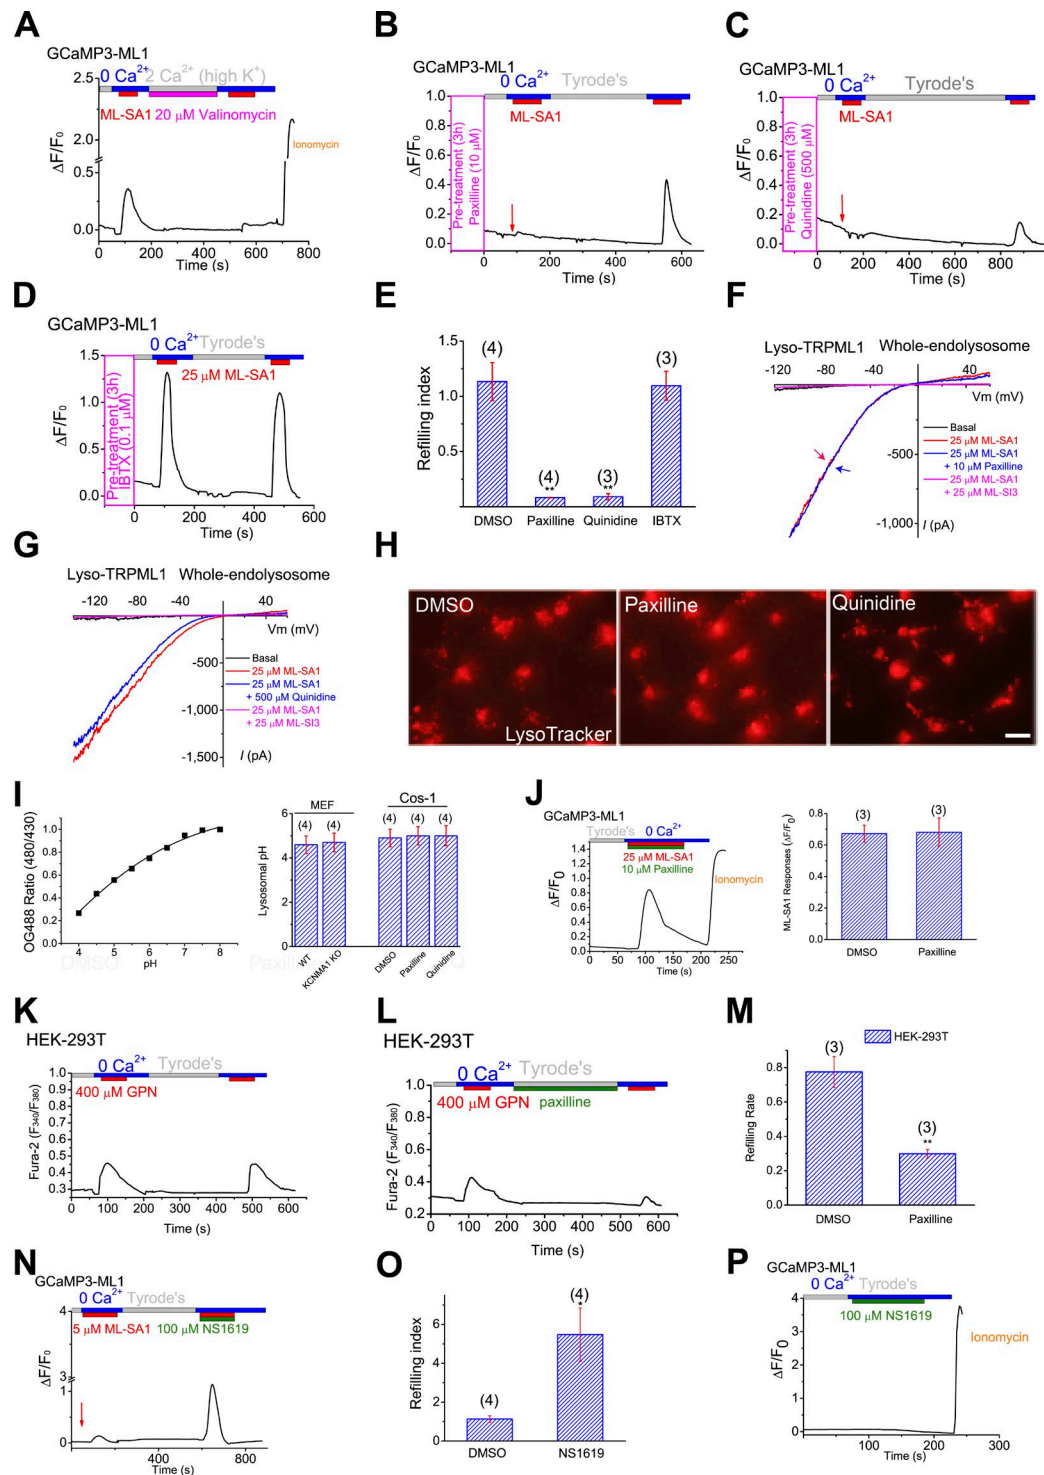

**Figure S6. Regulation of lysosomal  $Ca^{2+}$  refilling by LysoK<sub>vca</sub>.** (A) ML-SA1-induced  $Ca^{2+}$  release in HEK-GCaMP3-ML1 cells in the presence of high (140 mM)  $K^+$  extracellular solution. A 5-min valinomycin treatment in the refilling phase abolished lysosomal  $Ca^{2+}$  refilling. (B–D) Pretreatment of cells with paxilline (10  $\mu M$ ); B) or quinidine (500  $\mu M$ ); C) for 3 h abolished ML-SA1-induced  $Ca^{2+}$  release, whereas IBTX (0.1  $\mu M$ ); D) pretreatment did not affect  $Ca^{2+}$  release in HEK-GCaMP3-ML1 cells. (E) Normalized ML-SA1 induced responses in control and paxilline-, quinidine-, and IBTX-pretreated cells. Mean responses of 15–30 cells in one coverslip are shown (mean  $\pm$  SEM). (F and G) Neither paxilline (F) nor quinidine (G) affected whole-endolysosome ML1 currents, which were activated by ML-SA1 and inhibited by ML-SI3. (H) Pretreatment of Cos-1 cells with paxilline (10  $\mu M$ ) or quinidine (500  $\mu M$ ) for 3 h did not elevate lysosomal pH, which was monitored by LysoTracker (LysoTracker Red DND-99) fluorescence. (I) Lysosomal pH in WT and KCNMA1 KO MEFs and in Cos-1 cells under paxilline and quinidine treatments. (J) Effect of paxilline on naive ML-SA1-induced lysosomal  $Ca^{2+}$  release in GCaMP3-ML1 cells. (K–M) Paxilline significantly reduced refill response (second lysosomal  $Ca^{2+}$  release) stimulated by GPN in HEK-293T cells. (N) The effects of BK opener NS1619 (100  $\mu M$ ) on lysosomal  $Ca^{2+}$  release induced by ML-SA1 in HEK-GCaMP3-ML1 cells. (O) Normalized second ML-SA1 responses to acute application of NS1619. (P) NS1619 did not directly induce lysosomal  $Ca^{2+}$  release. Note that this compound is known to induce ER  $Ca^{2+}$  release in muscle cells (Wrzosek, 2014). For all panels, means  $\pm$  SEM are shown. Statistical comparisons were made using variance analysis (Student's *t* test for E, I, J, M, and O). Bar, 50  $\mu m$ . Statistical comparisons were made with variance analysis (Student's *t* test). \*,  $P < 0.05$ ; \*\*,  $P < 0.01$ .

## Reference

Wrzosek, A. 2014. The potassium channel opener NS1619 modulates calcium homeostasis in muscle cells by inhibiting SERCA. *Cell Calcium*. 56:14–24. <http://dx.doi.org/10.1016/j.ceca.2014.03.005>
